# Supplementary material for: Manganese Stress Tolerance Depends on Yap1 and Stress-Activated MAP Kinases
Source: MDPI journal article supplement (doi:10.3390/ijms232415706), 2022-12-11
Supplement: s1 [file s1]

Supplementary figures:

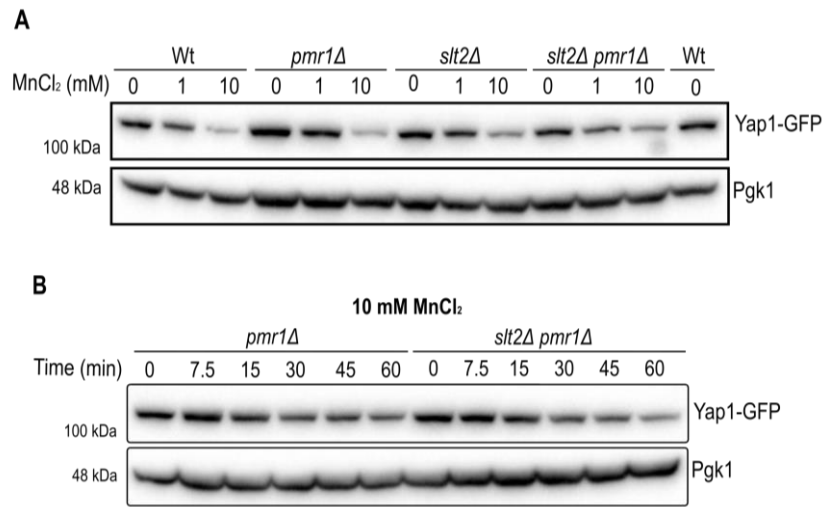

**Supplementary Figure S1:** MnCl<sub>2</sub>-driven Yap1 decay is Slt2 independent. **(A)** Analysis of Yap1-GFP protein levels by immunoblotting with anti-GFP antibodies. Strains are indicated. Exponentially growing Wt and indicated mutant strains were treated for 1 h with 1 mM or 10 mM MnCl<sub>2</sub> prior to protein isolation. Pgk1 was used as a loading control. **(B)** Comparison of time-dependent Yap1-GFP protein loss in *pmr1Δ* single and *pmr1Δ slt2Δ* double mutants treated with 10 mM MnCl<sub>2</sub> for the indicated times (min).
